# Supplementary material for: A self-seeded, surfactant-directed hydrothermal growth of single crystalline lithium manganese oxide nanobelts from the commercial bulky particlesElectronic supplementary information (ESI) available: SEM images of commercial lithium manganese oxide bulky particles and the products synthesized under different conditions as well as lithium manganese oxide nanobelts, Se nanorods and MnO2 nanorods grown on the bulky particles and Te nanotubes. See http://www.rsc.org/suppdata/cc/b3/b310998d/
Source: Royal Society of Chemistry journal article supplement (doi:10.1039/b310998d), 2003-01-01
Supplement: b310998d.doc [file b310998d.doc]

# Electronic Supplementary Information (ESI)

**A self-seeded, surfactant-directed hydrothermal growth of single crystalline lithium manganese oxide nanobelts from the commercial bulky particles**

Lizhi Zhang,a Jimmy C. Yu,*,a An-Wu Xu,a Quan Li,b Kwan Wai Kwong,b Ling Wua

aDepartment of Chemistry and Environmental Science Programme, The Chinese University of Hong Kong, Shatin, New Territories, Hong Kong, China

Email: [jimyu@cuhk.edu.hk](mailto:jimyu@cuhk.edu.hk)

bDepartment of Physics, The Chinese University of Hong Kong, Shatin, New Territories, Hong Kong,


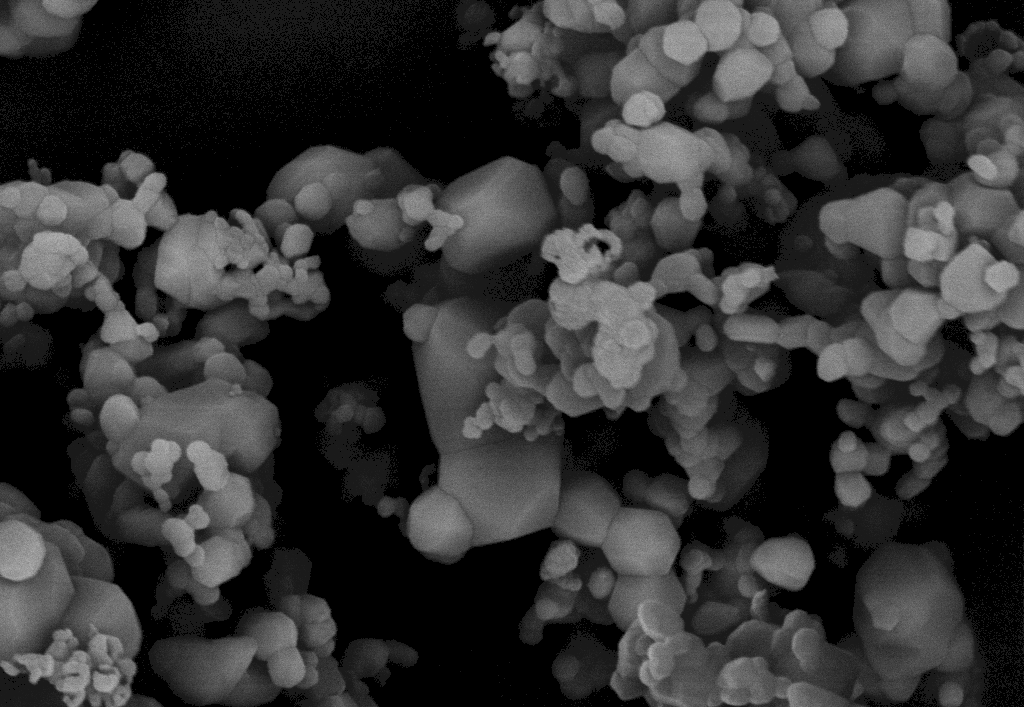


**1 μm**

**Figure S1** SEM image of the commercial lithium manganese oxide bulky particles.


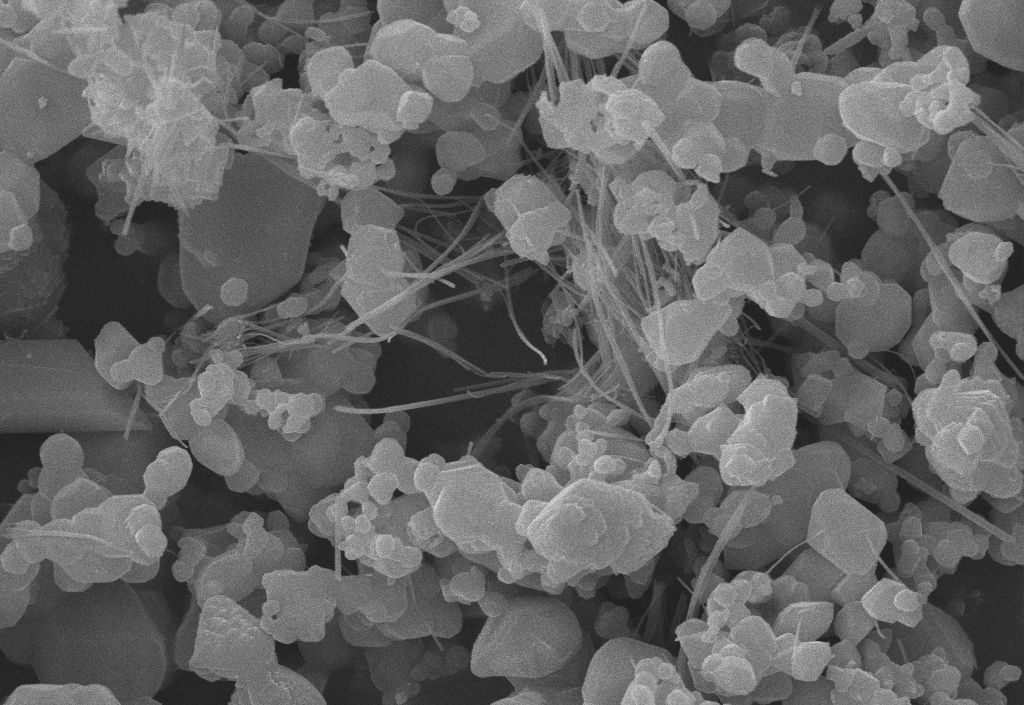


**1 μm**

**Figure S2** SEM image of the product synthesized with 0.4 g LiMn2O4 and 0.2 g NaAOT in 17 mL deionized water under 160 oC hydrothermal treatment for 24 h. It is obvious that the yield of the nanobelts is lower than that obtained under the reaction conditions described in the main text.

The amounts of bulky LiMn2O4 particles, water and NaAOT used in the hydrothermal processing affect the reaction yield. An increase in the bulky LiMn2O4 particles and a decrease in the water content would decrease the yield of the nanobelts. The optimum concentration of NaAOT is found to be 2.5 g/L. It is also found that the reaction temperature for the formation of the LiMn2O4 nanobelts is between 150 and 170 oC. Hydrothermal treatment at higher than 180 oC would destroy the LiMn2O4 crystal structure. While hydrothermal treatment temperatures much lower than 150 oC would drastically decrease the yield of the nanobelts.


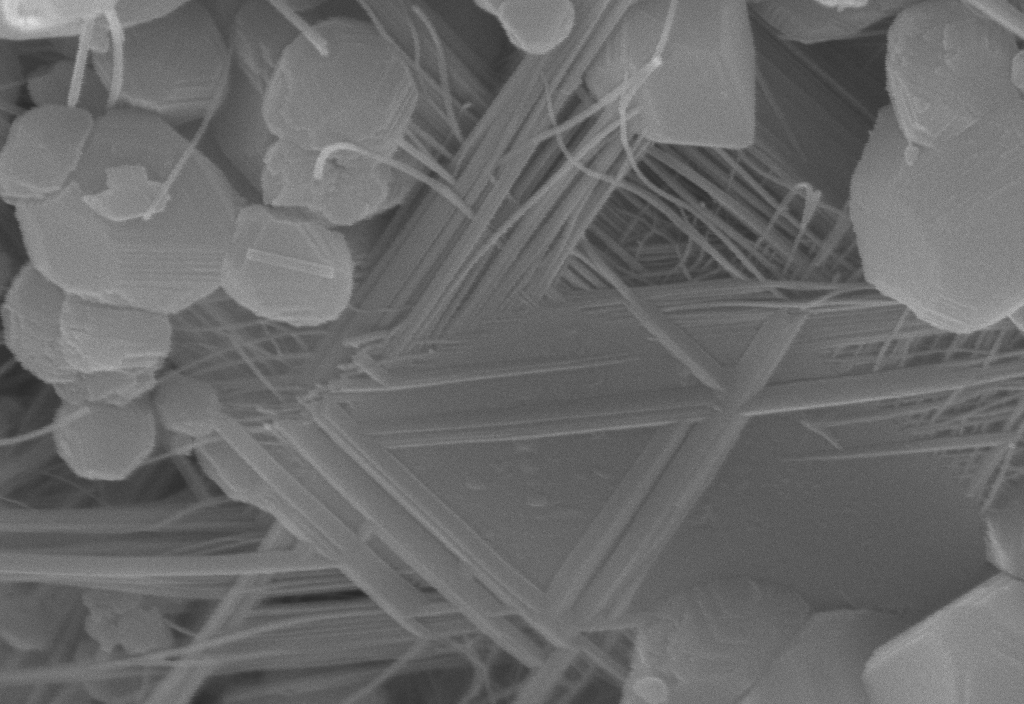


**1 μm**

**a**


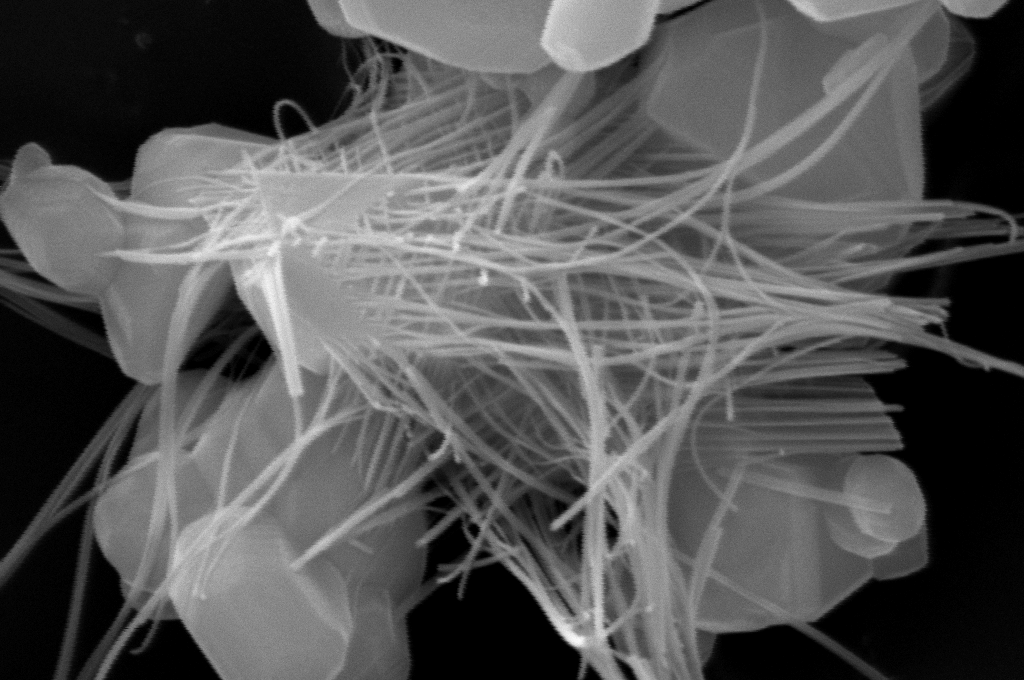


**1 μm**

**b**

**Figure S3** SEM images of lithium manganese oxide nanobelts grown on the bulky particles. (a) 0.4 g LiMn2O4 and 0.2 g NaAOT in 17 mL deionized water under hydrothermal treatment at 160 oC for 24 h. (b) 0.4 g LiMn2O4 and 1.0 g NaAOT in 17 mL deionized water under hydrothermal treatment at 160 oC for 24 h.


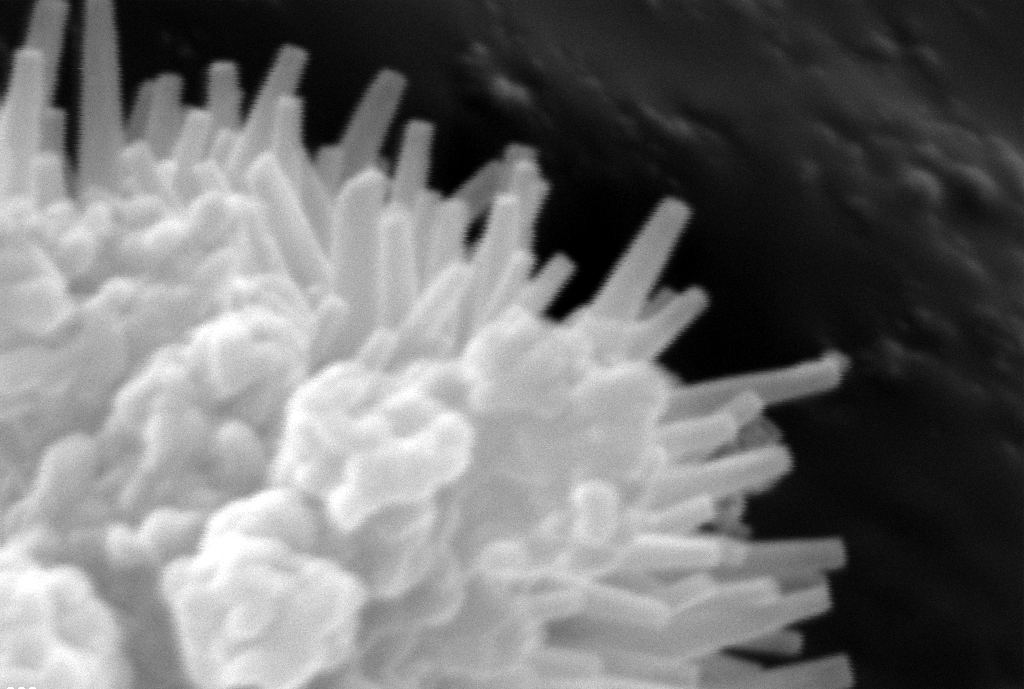


**1 μm**

**Figure S4** SEM image of Se nanorods grown on the bulky particles. The sample was obtained by hydrothermal treatment of commercial Se powders in the presence of NaAOT.


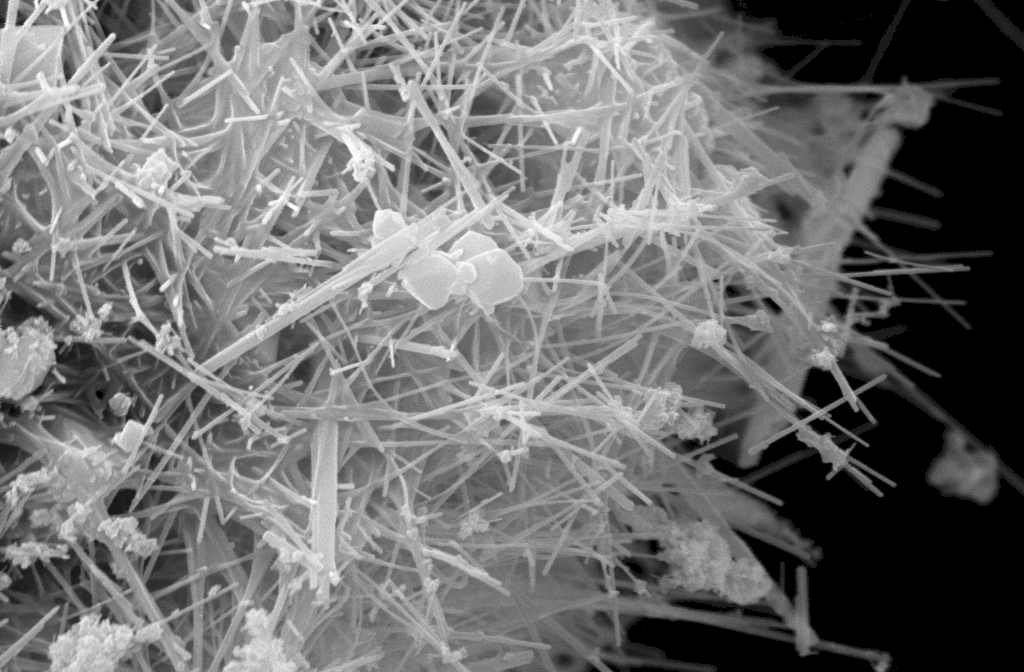


**2 μm**

**Figure S5** SEM image of MnO2 nanorods grown on the bulky particles. The sample was obtained by hydrothermal treatment of commercial MnO2 powders in the presence of octadecylamine.


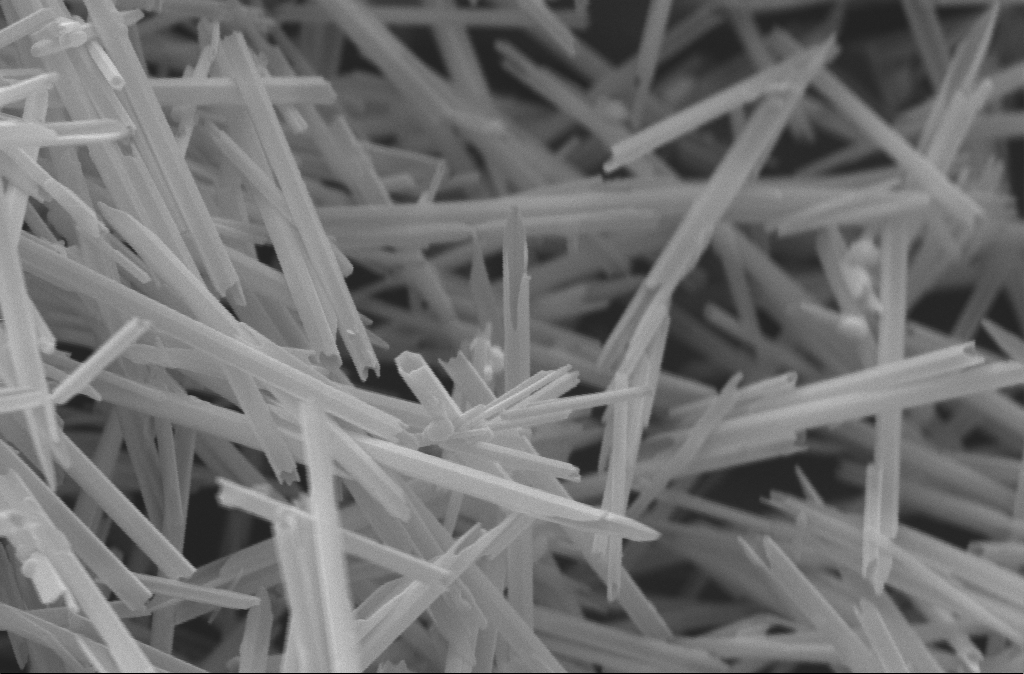


**2 μm**

**Figure S6** SEM image of Te nanotubes. The sample was obtained by hydrothermal treatment of commercial Te powders in the presence of NaAOT.
